1 **Ivermectin converts cold tumors hot and synergies with immune checkpoint blockade**  
2 **for treatment of breast cancer**

3

4

5 Dobrin Draganov<sup>1</sup>, Zhen Han<sup>1</sup>, Nitasha Bennett<sup>2</sup>, Darrell J. Irvine<sup>2,3</sup>, Peter P. Lee<sup>1</sup>

6 <sup>1</sup> Department of Immuno-Oncology, Beckman Research Institute, City of Hope, Duarte, CA

7 <sup>2</sup> Koch Institute for Integrative Cancer Research and Department of Biological Engineering,  
8 Massachusetts Institute of Technology, Cambridge, MA

9 <sup>3</sup> Howard Hughes Medical Institute, Chevy Chase, MD

10

11 Correspondence should be addressed to:

12 Peter P. Lee, M.D.

13 Dept. of Immuno-Oncology, City of Hope and Beckman Research Institute, Beckman Center,  
14 room 5117, 1500 East Duarte Road, Duarte, CA 91010

15 Phone: 626.218.2519

16 Fax: 626.301.8817

17 Email: [plee@coh.org](mailto:plee@coh.org)

18 **Abstract**

19 We show that treatment with the FDA-approved anti-parasitic drug ivermectin induces  
20 immunogenic cancer cell death (ICD) and robust T cell infiltration into breast tumors. As an  
21 allosteric modulator of the ATP/P2X4/P2X7 axis which operates in both cancer and immune  
22 cells, ivermectin also selectively targets immunosuppressive populations including myeloid cells  
23 and Tregs, resulting in enhanced Teff/Tregs ratio. While neither agent alone showed efficacy *in*  
24 *vivo*, combination therapy with ivermectin and checkpoint inhibitor anti-PD1 antibody achieved  
25 synergy in limiting tumor growth ( $p=0.03$ ) and promoted complete responses ( $p<0.01$ ), also  
26 leading to immunity against contralateral re-challenge with demonstrated anti-tumor immune  
27 responses. Going beyond primary tumors, this combination achieved significant reduction in  
28 relapse after neoadjuvant ( $p=0.03$ ) and adjuvant treatment ( $p<0.001$ ), and potential cures in  
29 metastatic disease ( $p<0.001$ ). Statistical modeling confirmed bona fide synergistic activity in both  
30 the adjuvant ( $p=0.007$ ) and metastatic settings ( $p<0.001$ ). Ivermectin has dual  
31 immunomodulatory and ICD-inducing effects in breast cancer, converting ‘cold’ tumors ‘hot’, thus  
32 represents a rational mechanistic partner with checkpoint blockade.

33

34 Checkpoint blockade (1, 2) has emerged as a revolutionary approach that harnesses a patient's  
35 own immune system to treat cancer. However, checkpoint inhibitors as single agents are only  
36 effective in a subset of patients and cancer types (2). Recent studies suggest that efficacy of  
37 checkpoint inhibitors is primarily limited to cancers already infiltrated by T cells – often termed  
38 'hot' tumors. In contrast, 'cold' tumors have little to no T cell infiltration and generally do not  
39 respond to checkpoint blockade. Early clinical studies with checkpoint blockade therapy in breast  
40 cancer have focused on triple negative breast cancer (TNBC), because this subtype has a higher  
41 mutational load and is thought to be more 'immunogenic' (3). Even so, anti-PD1/PDL1 antibodies  
42 have produced clinical responses in only a small subset (15-20%) of TNBC patients (4). As such,  
43 there is considerable interest in identifying drugs capable of priming breast tumors (turning 'cold'  
44 tumors 'hot') to synergize with checkpoint blockade.

45 A recently described phenomenon, termed immunogenic cell death (ICD) (5, 6), is a form of cell  
46 death that induces an immune response from the host. ICD is distinguished from classical  
47 apoptosis and other non-immunogenic or tolerogenic forms of cell death by several hallmarks,  
48 including release of ATP and HMGB1 and surface exposure of calreticulin (5-7). In cancer  
49 patients, ICD-based anti-tumor immune responses are linked to beneficial outcomes produced  
50 by some conventional chemotherapeutic agents (8-11). For example, efficacy of anthracyclines  
51 in breast cancer (12-14) and oxaliplatin in colorectal cancer (15) correlates with post-treatment  
52 increases in the ratio of cytotoxic CD8<sup>+</sup> T lymphocytes to FoxP3<sup>+</sup> regulatory T cells within the  
53 tumor. In contrast, poor responses to chemotherapy in solid tumors are associated with  
54 lymphopenia (16). Thus, ICD-inducing chemotherapy appears to work in conjunction with the  
55 host immune system to achieve efficacy. However, chemotherapy is a double-edged sword: it  
56 can suppress as well as stimulate immune cells. An agent that induces ICD of cancer cells

57 without suppressing immune function would be ideal for combination with checkpoint blockade.  
58 Seeking such an agent among FDA-approved drugs, our group found that the anti-parasitic  
59 agent ivermectin promotes ICD in breast cancer cells(17). Among our previous findings was  
60 evidence that ivermectin, an anti-parasitic drug used worldwide since 1975, modulates the  
61 P2X4/P2X7 purinergic pathway, suggesting that ivermectin may further harness tumors' intrinsic  
62 high extracellular levels of ATP for anti-cancer activity. Of note, P2X4/P2X7 receptors are widely  
63 expressed on various immune subpopulations, suggesting that ivermectin might also have direct  
64 immunomodulatory effects.

## 65 **Results**

### 66 **Ivermectin can turn 'cold' breast tumors 'hot'**

67 Motivated by these findings, we studied the effects of ivermectin *in vivo* using the 4T1 mouse  
68 model of TNBC. HMGB1 is a chromatin protein present in all cells and its release is a hallmark  
69 of ICD (18). HMGB1 staining (green) was observed uniformly across the entire tumor from  
70 untreated mice (Fig. 1A). In contrast, tumors isolated from mice treated with ivermectin showed  
71 large areas of DAPI-positive cells lacking HMGB1 (Fig. 1B), suggesting that HMGB1 had been  
72 released into the extracellular space. Ivermectin treatment also altered calreticulin expression,  
73 with higher levels (green) observed in tumors from treated animals, indicating a significant  
74 increase in this ICD-associated prophagocytic signal and mediator (Fig. 1C-D). Robust  
75 infiltration of both CD4<sup>+</sup> and CD8<sup>+</sup> T cells was seen in ivermectin-treated tumors (Fig. 1F) but  
76 not in untreated tumors (Fig. 1E). Significantly higher percentages of cells were positive for CD4  
77 ( $p < 0.01$ , Fig. 1G) and CD8 ( $p < 0.0001$ , Fig. 1H) in ivermectin-treated than in untreated tumors.  
78 Together, these data indicate that treatment with ivermectin induced hallmarks of ICD within 4T1

79 breast tumors and recruited large numbers of CD4<sup>+</sup> and CD8<sup>+</sup> T cells into these tumors. To  
80 further confirm that ivermectin induces ICD *in vivo*, we also utilized a classical vaccination  
81 approach considered as the gold standard for detection of ICD: by treating 4T1 cells with IVM to  
82 induce ICD *in vitro* as well as to prevent tumor outgrowth after inoculation into naïve mice,  
83 followed by subsequent challenge with live 4T1 cells (18). This experiment validated the  
84 induction of *bona fide* ICD by demonstrating protection against subsequent challenge with live  
85 4T1 cells ( $p < 0.01$ , Fig. 1I).

### 86 **Direct immunomodulatory effects of Ivermectin**

87 Ivermectin treatment *in vivo* did not produce any significant changes in the frequencies of various  
88 effector and regulatory CD4 (Fig. S2A) or CD8 (Fig. S2B) T cell subpopulations isolated from  
89 the spleens of treated animals. However, functional interrogation of splenocytes isolated from  
90 control vs. 4T1 tumor-bearing mice revealed significant immunomodulatory effects. Tumor-  
91 bearing mice one month post-inoculation developed enlarged spleens with an expanded  
92 population of CD11b<sup>+</sup> myeloid cells (Fig. 2A). Ivermectin treatment *ex vivo* preferentially  
93 depleted this expanded CD11b<sup>+</sup> myeloid population, normalizing the balance between myeloid  
94 and T cell compartments (Fig. 2A). Myeloid and lymphoid cell populations showed differential  
95 sensitivity to increasing doses of Ivermectin (Fig. 2B, S2C). A linear mixed effects model of log  
96 cell count adjusted for cell type revealed that CD11b<sup>+</sup> myeloid cells were the most sensitive to  
97 ivermectin, showing significant reductions with as little as 4  $\mu\text{M}$  after 48 hours, 8  $\mu\text{M}$  after 24  
98 hours, or 16  $\mu\text{M}$  after 4 hours - demonstrating rapid and selective targeting of this  
99 immunosuppressive population (each result,  $p < 0.0001$ ). In contrast, achieving similar reductions  
100 in CD4 or CD8 T cells required higher doses and/or longer exposure to ivermectin: observed in

101 CD8 T cells only after 48 hours of 8  $\mu$ M or 24 hours of 16  $\mu$ M, and in CD4 T cells only after the  
102 maximum exposure (48 hours of 16  $\mu$ M). Consistent with ivermectin being an allosteric  
103 modulator of the ATP/P2X4/P2X7 signaling axis which operates in both cancer and immune  
104 cells, differential sensitivity in myeloid cells was P2X7-dependent (Fig. 2C). P2X7 blockade with  
105 10  $\mu$ M KN62 reversed the *ex vivo* depletion of CD11b+GR-1+ myeloid-derived suppressor cells  
106 (MDSC), CD11b+GR-1- Monocytes/Macrophages (Mon/Mac), and other immune subsets by  
107 ivermectin ( $p < 0.001$ ). To mimic more physiologically relevant conditions of exposure, we also  
108 treated splenocytes with lower non-cytotoxic doses of ivermectin and observed that over  
109 extended exposure, ivermectin had a significant potentiating effect on PHA-stimulated T cells  
110 and augmented the ratios of both CD8+ and CD4+ Teff/Tregs (Fig. 2D). The immuno-  
111 potentiating effects of extended exposure to lower non-cytotoxic doses of ivermectin was  
112 enhanced upon TCR stimulation (via PHA) and was inhibited in splenocytes from tumor-bearing  
113 mice (Fig. 2D), where different mechanisms including MDSCs as well as PD-1-mediated  
114 immunosuppression are known to interfere with proper TCR signaling and function.

115 **Ivermectin synergizes with anti-PD1 antibody to control tumor growth and induces**  
116 **protective immunity**

117 The anti-cancer ICD and direct immunomodulatory effects of ivermectin raised the possibility  
118 that it could be combined with checkpoint blockade. We next investigated the efficacy of  
119 ivermectin and anti-PD1 antibody, alone or in combination, relative to no treatment (schema in  
120 Fig. S1A). Mean tumor volume over time was significantly decreased by the ivermectin and anti-  
121 PD1 antibody combination relative to no treatment ( $p < 0.001$ , Fig. 3A). Through a joint statistical  
122 model of longitudinal tumor volumes, ivermectin and anti-PD1 antibody demonstrated synergistic

123 activity, defined as an effect that is significantly greater than the sum of the drugs' individual  
124 effects (submodel  $p=0.008$ , false discovery rate/FDR 3%, Table 1A). Complete tumor resolution  
125 was observed in 6/15 mice on the combination treatment, 1/20 on ivermectin alone, 1/10 on anti-  
126 PD1 antibody alone, and 0/25 on no treatment. Mice that resolved tumors on the ivermectin and  
127 anti-PD1 combination therapy were re-challenged with 100,000 4T1 cells in the contralateral  
128 mammary fat pads. All of these mice resisted development of new tumors (Fig. 3B), while control  
129 naïve animals all developed tumors (data not shown). This suggests that combined treatment  
130 with ivermectin and anti-PD1 induces protective anti-tumor immunity in complete responders.

131 To gain further insight into the mechanism underlying efficacy of the combined treatment, we  
132 compared the magnitude to which ivermectin, anti-PD1, and their combination potentiated the  
133 infiltration of T cells. As shown visually in Fig. 3C and quantitatively in Fig. 3D, infiltration of both  
134 CD4<sup>+</sup> and CD8<sup>+</sup> T cells into 4T1 tumors (Day 21) was greatest after treatment with the  
135 combination of ivermectin and anti-PD1. To measure anti-tumor T cells, splenocytes were  
136 isolated from untreated, single agent treated or ivermectin plus anti-PD1 combination treated  
137 mice, then co-cultured with 4T1 cells as targets to measure CD107 mobilization and IFN- $\gamma$   
138 expression as markers for functional T cell responses (19). A functional tumor-specific immune  
139 response was confirmed by the presence of a discrete population of CD8<sup>+</sup> T cells positive for  
140 CD107 and IFN- $\gamma$  in mice treated with ivermectin plus anti-PD1, but not in mice treated with anti-  
141 PD1 alone or untreated controls ( $p<0.01$ ; Fig. 3E, F).

#### 142 **Combination therapy effective across spectrum of clinically relevant settings**

143 Moving beyond control of primary tumors, we sought to test this combination immunotherapy  
144 across the major clinically relevant settings: neoadjuvant, adjuvant, and metastatic treatments.

145 We also explored the effects of further augmenting this combination immunotherapy with  
146 Interleukin-2 (IL-2). IL-2 was the first cytokine to be successfully used in the treatment of cancer  
147 to induce T cell activation(20). A major challenge in the development of IL-2 as a therapeutic  
148 antitumor agent is that IL-2 can act on both T cells and regulatory T cells (Tregs). The contrasting  
149 actions of IL-2 has led to inconsistent responses and limited the development of high-dose IL-2  
150 for cancer immunotherapy. Increasing the half-life of IL-2 has been shown to be a promising  
151 strategy for improving IL-2 based immunotherapy. This can greatly reduce the dose of IL-2  
152 required for therapeutic activity, enhancing both safety and efficacy (21, 22). We explored the  
153 secondary hypothesis that addition of a recombinant albumin-IL-2 fusion with extended half-life  
154 to the ivermectin and anti-PD1 regimen (anti-PD-1 + IL-2 therapy, termed “IP” for simplicity) can  
155 further improve the efficacy of our combined treatment.

156 Neoadjuvant therapy has come to play an increasingly prominent role in the treatment of cancer.  
157 We tested treatment of ivermectin combined with anti-PD-1 and IL-2 (IP) by monitoring survival  
158 of animals receiving neoadjuvant combination therapy followed by surgical resection of the  
159 primary tumor on day 16 following tumor inoculation (schema in Fig. S1A). Development of loco-  
160 regional recurrence and distant metastases were monitored by bioluminescent imaging, and  
161 animals were euthanized upon decline in body condition score and signs of morbidity. All  
162 untreated animals required euthanasia due to lethal diseases around day 20-25 following  
163 surgical resection of primary tumor (Fig. 4A). Treatment with IP therapy alone provided some  
164 survival benefit with approximately 40% of animals remaining free of lethal disease. The best  
165 survival outcome was seen with the combination of IP and ivermectin therapy, with  
166 approximately 75% of animals becoming long-term survivors following surgical resection  
167 ( $p < 0.05$ , Fig. 4A). Surviving treated mice were re-challenged with 100,000 4T1 cells in the



168 contralateral mammary fat pads. The majority of IVM + IP treated mice did not develop new  
169 tumors (Fig. 4B), while IP treated and control naïve mice all developed tumors. Splenocytes from  
170 these animals were reactive (via ELISPOT) against 4T1 cells, demonstrating evidence for anti-  
171 tumor T cell responses in the IVM + IP treated animals (Fig. 4C). These results suggest that the  
172 IVM + IP combination treatment is effective in the neoadjuvant setting and induces protective  
173 anti-tumor immunity in responders.

174 Surgery remains the primary treatment for breast cancer; however, relapse is common  
175 necessitating adjuvant therapy in high-risk patients post-surgery. We assessed the efficacy of  
176 ivermectin, anti-PD1, and recombinant IL-2 alone or in combination as adjuvant immunotherapy  
177 after surgery. 4T1 cells expressing luciferase ( $0.5 \times 10^6$ , 4T1-Luc) were injected into the  
178 mammary pad of female BALB/c mice and allowed to grow into palpable tumors over 10 days,  
179 after which tumors were surgically resected. Treatment was initiated on day 2 following surgery  
180 to mimic adjuvant therapy (schema in Fig. S1A). Development of recurrence and metastasis was  
181 monitored at multiple time points via bioluminescence imaging (Day 17 shown, Fig. 4D), then  
182 animals were monitored until they met euthanasia criteria based on decline in body condition  
183 score and signs of morbidity. Treatment with anti-PD1 or IVM alone led to similar survival as  
184 untreated controls (Fig. 4E). Animals treated with the combination of ivermectin and anti-PD1  
185 (with or without IL-2) had significantly prolonged survival, with approximately 40% of animals  
186 becoming long-term survivors ( $p < 0.001$ , Fig. 4E). Through statistical modeling, the ivermectin  
187 and anti-PD1 combination was found to be highly synergistic compared to IVM or anti-PD-1  
188 alone (submodel  $p = 0.007$ , FDR 2%, Table 1B). Interestingly, addition of IL-2 did not further  
189 enhance the survival benefit from the ivermectin and anti-PD1 combination (submodel  $p = 0.51$ ,  
190 FDR 67%, Table 1B). These data demonstrate that treatment with ivermectin and anti-PD1 (with

191 or without IL-2) is effective in the adjuvant setting, without evidence for drug related or synergistic  
192 toxicity based on parallel body weight observations (Fig. S1B).

193 Metastasis is the main cause of death in cancer patients including breast cancer. To test the  
194 efficacy of this combination in the metastatic setting, we delayed treatment until at least 25% of  
195 animals post-surgery had detectable metastasis (generally day 7 after surgical resection of  
196 primary tumor). Progression of metastasis was monitored via bioluminescence imaging (schema  
197 in Fig. S1A), and animals were monitored until they met euthanasia criteria based on decline in  
198 body condition score and signs of morbidity (examples shown in Fig. 4F). All untreated animals  
199 required euthanasia due to metastatic disease around day 20-40 following surgical resection of  
200 primary tumor (Fig. 4G). Treatment with IVM alone led to modest, non-significant prolongation  
201 of survival as compared to untreated controls (Fig. 4G). Survival was slightly prolonged in  
202 animals treated with anti-PD1 only ( $p < 0.05$ ), but all animals required euthanasia by Day 60 as  
203 in the IVM alone group. Survival was significantly prolonged in animals treated with ivermectin  
204 and anti-PD1 ( $p < 0.001$ ), or ivermectin, anti-PD1 and IL-2 ( $p < 0.01$ ) as compared to untreated  
205 controls (Fig. 4G). Approximately 40% of animals on the combination therapy become long-term  
206 survivors. The combined effect of IVM and anti-PD-1 on survival in the metastatic setting was  
207 again found to be highly synergistic compared to IVM or anti-PD-1 alone (submodel  $p < 0.001$ ,  
208 FDR  $< 1\%$ , Table 1C). As in the adjuvant setting, addition of IL-2 did not further enhance the  
209 survival benefit from the ivermectin and anti-PD1 combination (submodel  $p = 0.64$ , FDR 73%,  
210 Table 1C). These data demonstrate that treatment with ivermectin and anti-PD1 (with or without  
211 IL-2) is also effective in the metastatic setting.

## 212 Discussion

213 Since its discovery in the mid-1970s, ivermectin has been used safely by over 700 million people  
214 worldwide to treat river blindness and lymphatic filariasis (23); it is inexpensive and accessible.  
215 Our results demonstrate that treatment with ivermectin induces robust T cell infiltration into  
216 breast tumors via induction of ICD, thus turning 'cold' tumors 'hot'. Unlike conventional  
217 chemotherapy drugs, this agent has the added benefit of not suppressing host immune function,  
218 but rather has beneficial immunomodulatory effects - making it a promising and mechanistic  
219 partner for immune checkpoint blockade. The release and accumulation of high levels of  
220 extracellular ATP has emerged as a key characteristic feature of the tumor microenvironment  
221 (24), and a hallmark of ICD. We and others have previously shown that ivermectin is a positive  
222 allosteric modulator of purinergic signaling and the ATP/P2X4/P2X7/Pannexin-1 axis which  
223 operates in both cancer and immune cells (17, 25). In murine splenocytes treated *ex vivo*, we  
224 showed that ivermectin can selectively target various immune subpopulations in a P2X7-  
225 dependent fashion (Fig. 2B, C) and has immune-potentiating activities associated with  
226 augmented ratios of immune effectors versus immunosuppressive populations, including Tregs  
227 and myeloid cells (Fig. 2A, D). The observed selective targeting of different immune populations  
228 by ivermectin is consistent with previous reports demonstrating that mouse splenic Tregs  
229 (CD4+CD25+) have higher sensitivity to increasing (>100  $\mu$ M) doses of extracellular ATP  
230 compared to CD8+ and CD4+CD25- T cells (26). This differential sensitivity to extracellular ATP  
231 is P2X7-dependent and directly associated with levels of surface P2X7 receptor expression  
232 (CD4+CD25+ > CD4+CD25- > CD8+ T cells). Recent reports showed that the ATP/P2X7 axis  
233 also operates in MDSC and MDSC-mediated immunosuppression (27, 28). This is consistent  
234 with our finding that ivermectin can selectively target expanded myeloid cells isolated from

235 tumor-bearing mice *ex vivo* in a P2X7-dependent fashion. Further research will be needed to  
236 elucidate the relative sensitivities of different subsets of MDSC and tumor-associated  
237 macrophages/neutrophils (TAMs/TANs) to ivermectin, as well as to validate the *in vivo* effects  
238 of ivermectin on various myeloid subsets within the tumor microenvironment and systemically.

239 While differential ATP/P2X7-dependent cytotoxicity may be one possible explanation for the  
240 immunomodulatory effects of ivermectin *in vivo*, recent reports also implicate ATP release and  
241 P2X4-dependent signaling in the CXCL12/CXCR4-mediated migration and inflammation-driven  
242 recruitment of T cells (29). The role of P2X4 in T cell activation, proliferation and migration was  
243 particularly pronounced in CD4 T cells, which is consistent with our own data demonstrating  
244 ivermectin to be particularly potent at increasing the CD4+ Teff/Treg ratios in *ex vivo* treated  
245 splenocytes (Fig. 2D) and augmenting intra-tumoral infiltration with CD4+ T cells (Fig. 3D). Thus,  
246 infiltration of tumors by T cells in ivermectin treated mice may reflect a combination of selective  
247 depletion of suppressive cells as well as recruitment effects. The synergistic activity between  
248 ivermectin and anti-PD-1 checkpoint blockade at driving T cell infiltration into the tumor  
249 microenvironment is particularly intriguing as PD-1 functions as a negative feedback regulator  
250 of TCR signaling. P2X4/P2X7-gated Pannexin-1(PANX1) opening and ATP release play a  
251 central role in T cell activation by providing a feed-forward loop for TCR-initiated and ATP-driven  
252 ATP release at the immunological synapse. The ability of ivermectin as an allosteric modulator  
253 of P2X4/P2X7/PANX1 receptors to modulate purinergic signaling operating in both cancer and  
254 immune cells therefore may be enhanced by elevated levels of ATP within the tumor  
255 microenvironment and the immunological context, including magnitude of chemokine/TCR  
256 signaling and chemokine/TCR-driven ATP release. Consistent with the latter possibility, we  
257 demonstrated that the potentiating effect of ivermectin on the Teff/Treg ratio appears to be

258 stronger and sustained in the presence of TCR stimulation (Fig. 2D). Further studies will be  
259 needed to unravel how these multi-faceted effects of ivermectin to induce immunogenic cancer  
260 cell death, differentially modulate immune cells, and harness the ATP-rich tumor  
261 microenvironment may all contribute to its ability to synergize with immune checkpoint blockade  
262 *in vivo*.

263 Immune checkpoint inhibitors (ICI) are effective as single agents only in a small subset of cancer  
264 patients. Hundreds of clinical trials are currently testing various combinations of ICI with FDA-  
265 approved or experimental agents. Such combinations are mainly put together based on partial  
266 efficacy of the partnering agent with little or no mechanistic rationale for synergy. Importantly,  
267 recent analyses found no evidence from any trial data reported to date that ICIs are synergistic  
268 or additive with other drugs (30), but instead synergistic toxicity may be observed (31, 32). We  
269 showed that ivermectin represents a rational mechanistic partner for immune checkpoint  
270 blockade, demonstrating bona fide synergy when neither agent worked alone. Synergy between  
271 PD-1 blockade and ivermectin is mechanistically associated with the ability of the ivermectin to  
272 drive immunogenic cancer cell death and T cell infiltration into tumors, thus converting 'cold'  
273 tumors 'hot' (33). This combination led to complete resolution of the primary tumor in a significant  
274 fraction of animals, and with protective anti-tumor immunity in the responders. We went on to  
275 demonstrate that this novel combination is effective in the neoadjuvant, adjuvant, and metastatic  
276 settings that mimic clinical situations in which it may be used. Based on its novel dual  
277 mechanisms of action in cancer, ivermectin may also potentiate the anti-tumor activity of other  
278 FDA-approved immune checkpoint inhibitors. Lastly, ivermectin is inexpensive, making it  
279 attainable for everyone including cancer patients in developing countries. The preclinical findings  
280 we present suggest that the combination of ivermectin and anti-PD1 antibody merits clinical

281 testing in breast cancer patients.

282 **Figure Legends**

283 **Fig 1. Treatment with ivermectin induces immunogenic cell death (ICD) in vivo and**  
284 **recruitment of T cells into tumors.**

285 4T1 breast tumors were isolated from mice that were untreated (left panels) or ivermectin-  
286 treated (right panels) daily for 14 days. Figs. 1A, 1B show staining for HMGB1 (green), a  
287 hallmark of ICD. Figs. 1C, 1D show staining for calreticulin (green), another hallmark of ICD.  
288 Staining for CK7 (red) identifies 4T1 cells. Data are representative of two independent  
289 experiments. Figs. 1E, 1F show staining for CD4<sup>+</sup> (green), CD8<sup>+</sup> T cells (yellow), and cancer  
290 cells via staining for CK7 (red). Data are representative of three independent experiments.  
291 Figs. 1G and 1H display quantitative data on T cell infiltration shown in Figs 1E, 1F. Data were  
292 obtained by quantifying 5 random fields from whole tumor images. Fig. 1I demonstrates the  
293 protective effect of prophylactic subcutaneous vaccination with 1 million 4T1 cells treated with  
294 12  $\mu$ M ivermectin *ex vivo* (24h), then challenged contralaterally with live 4T1 cells one week  
295 post vaccination (n=4). Statistical significance was evaluated using the linear mixed effects  
296 model of log tumor volume. \*  $p \leq 0.05$ , \*\*  $p \leq 0.01$ , \*\*\*  $p \leq 0.001$ , \*\*\*\*  $p \leq 0.0001$ .

297

298 **Fig 2. Immunomodulatory effects of ivermectin *ex vivo*.** Splenocytes were isolated from  
299 the spleens of control naïve mice (CTRL) or untreated 4T1 tumor bearing mice (TB), one  
300 month post tumor inoculation, then cultured on 96-well tissue culture-treated plates in complete  
301 R10 medium for 4h-48h and analyzed by flow cytometry for spontaneous and ivermectin-  
302 induced changes in various immune subpopulations. (A) Depletion of the expanded CD11b<sup>+</sup>  
303 myeloid cells isolated from the spleens of tumor-bearing mice by ivermectin treatment *ex vivo*.  
304 (B, C) Splenocytes isolated from 4T1 tumor-bearing mice were exposed to increasing doses of  
305 ivermectin for 4h or 48h showing differential dose- and time-dependent sensitivity of different

306 immune subpopulations (see also Fig. S2C). Depletion of CD11b+GR-1+ MDSCs,  
307 CD11b+GR-1- Monocytes/Macrophages, CD19+ B cells and CD3+ T cells by IVM could be  
308 reversed by an inhibitor of P2X7/CaMKII (KN62 at 10  $\mu$ M). (D) Splenocytes from  
309 naïve/untreated (CTRL) and 4T1 tumor-bearing (TB) mice were incubated for 24h and 4 days  
310 with increasing doses of Ivermectin (1-16  $\mu$ M) with or without PHA to mimic TCR stimulation.  
311 Plots show averages and standard deviation based on triplicates; data representative of at  
312 least two independent experiments. Statistical significance versus (-) CTRL or as indicated  
313 was evaluated using the linear mixed effects model of log cell count adjusted for cell type: \*  $p \leq$   
314 0.05, \*\*  $p \leq 0.01$ , \*\*\*  $p \leq 0.001$ , \*\*\*\*  $p \leq 0.0001$ .

315

316 **Fig 3. Ivermectin synergizes with anti-PD1 therapy to control tumor growth in vivo.**

317 Mice were inoculated with 100,000 4T1 cells four days before initiating therapy with ivermectin  
318 alone (n=20), anti-PD1 antibody alone (n=10), both drugs (n=15), or no treatment (n=25). **(A)**  
319 Tumor volume in control and treated animals. \*  $p \leq 0.05$ . \*\*  $p \leq 0.01$ . \*\*\*  $p \leq 0.001$ . **(B)** Tumor  
320 growth in individual animals treated with ivermectin plus anti-PD1 antibody (5 individual mice  
321 from one representative of three experiments shown). Three of five combination treated animals  
322 completely resolved their tumors. Animals that resolved tumors were re-challenged with 100,000  
323 4T1 cells on the contralateral mammary fat pad 30 days after the termination of therapy. Mice  
324 were observed and palpated twice a week for an additional 30 days for the establishment of a  
325 tumor mass. **(C-F)** Combination therapy with ivermectin and anti-PD1 recruits significantly more  
326 T cells into tumor sites and generates tumor-reactive CD8+ T cells. Tumors were isolated from  
327 mice at Day 21. Staining was performed for nuclei (blue), CD4+ (green) cells, CD8+ cells  
328 (yellow), and tumor cells (red) **(C)**. Percent positive for CD4 or CD8 was measured in 5 random



329 fields in each group and divided by the number of nuclei in the field **(D)**. Data are representative  
330 of two independent experiments. \*  $p \leq 0.05$ , \*\*  $p \leq 0.01$ , \*\*\*\*  $p \leq 0.0001$ . Splenocytes isolated  
331 from tumor-bearing mice that received no treatment (n=5), anti-PD1 alone (n=5), or ivermectin  
332 with anti-PD1 (n=4) were co-cultured with 4T1 cells. Reactive CD8+ cells were determined by  
333 CD107 mobilization and expression of IFN $\gamma$  by flow cytometry. Representative flow plots for each  
334 treatment group are shown in **(E)**. **(F)** percentage of CD8+ T cells reactive against 4T1 per  
335 mouse, grouped by treatment. \*\*  $p \leq 0.01$ .

336

337 **Fig 4. Combination ivermectin and IP therapy in the neoadjuvant, adjuvant, and**  
338 **metastatic settings.**

339 (A) Survival of animals following surgical resection of primary tumor (on day 16 post tumor  
340 inoculation). (B) Induction of protective immunity in treated mice that survived beyond Day 80,  
341 then re-challenged with 4T1 cells on the contralateral mammary fat pad. (C) IFN $\gamma$  ELISPOT  
342 analysis of 4T1-reactive splenocytes in treated animals. Mean  $\pm$  s.d., n = 5 mice, pooled data  
343 from 2 independent experiments. \*  $p \leq 0.05$ , \*\*  $p \leq 0.01$ , \*\*\*  $p \leq 0.001$ . (D) In vivo  
344 bioluminescence imaging of mice (on Day 17 post surgery and after completion of the entire  
345 treatment schedule) treated with ivermectin, anti-PD1, ivermectin + anti-PD1 +/-IL-2 (IP), or  
346 control in the adjuvant setting. Mean  $\pm$  s.d., n = 5 mice, pooled data from 2 independent  
347 experiments. (E) Survival of animals in the adjuvant setting following surgical resection of  
348 primary tumor burden and treated starting 2 days after with ivermectin, anti-PD1, ivermectin +  
349 anti-PD1 +/-IL-2 (IP), or control. n = 5 mice per group, two-tailed log-rank test. \*\*  $p \leq 0.01$ , \*\*\*\*  
350  $p \leq 0.0001$ . (F) In vivo bioluminescence imaging (on Day 17 post surgery and after completion  
351 of the entire treatment schedule) of mice with documented metastasis, then treated with

352 ivermectin, anti-PD1, ivermectin + anti-PD1 +/-IL-2 (IP), or control. Mean  $\pm$  s.d., n = 5 mice,  
353 pooled data from 2 independent experiments. (G) Kaplan-Meier survival analysis of mice in the  
354 metastatic setting  
355 treated with ivermectin, anti-PD1, ivermectin + anti-PD1 +/- IL-2 (IP), or control. n = 5 mice per  
356 group, two-tailed log-rank test. \*  $p \leq 0.05$ , \*\*  $p \leq 0.01$ , \*\*\*  $p \leq 0.001$ .

357 **Acknowledgments:** Authors wish to acknowledge Dr. Steve Vonderfecht for advice and help  
358 on animal studies; Dr. Larry Wong and Gilbert Acosta for technical help; and Dr. Chris Gandhi  
359 for critical review of this manuscript.

360 **Funding:** This work was supported by the DoD Breast Cancer Research Program, Stand Up  
361 to Cancer, and Breast Cancer Research Foundation. Research reported in this publication  
362 includes work performed in the Biostatistics Core and Analytical Cytometry Core of City of  
363 Hope and supported by the National Cancer Institute of the National Institutes of Health under  
364 award number P30CA033572. The content is solely the responsibility of the authors and does  
365 not necessarily represent the official views of the National Institutes of Health. DJI is an  
366 investigator of the Howard Hughes Medical Institute.

367 **Author contributions:**

368 Conceptualization: PPL, DD, DJI, NB; Experimental work: DD, ZH, NB; Data analysis: DD, ZH,  
369 NB; Writing: DD, ZH, PPL, DJI, NB

370 **Competing interests:** None

371 **Data and materials availability:** Data required to reproduce the statistical analyses reported  
372 in the paper will be deposited in the Supplementary Materials. Access to those data is  
373 unrestricted.

374 **Materials and methods**

375 *Mice and treatment*

376 Female BALB/c mice were purchased from Charles River Laboratories at 5-8 weeks of age  
377 and housed in City of Hope's animal care facilities under pathogen-free conditions. All  
378 procedures were performed under approval from City of Hope's Animal Care and Use  
379 Committee. Mice were inoculated with 100,000 4T1 breast cancer cells in the right mammary  
380 fat pad, then palpated to check for tumor engraftment before commencing their assigned  
381 treatment regimen. Treatments included: 5 mg/kg of ivermectin (Sigma Aldrich, St. Louis MO)  
382 given via oral gavage daily for 6 days; 10 mg/kg of anti-PD1 (BioXCell, West Lebanon NH)  
383 treatment given subcutaneously once weekly; MSA-IL2 administered at 1.5 mg/kg by  
384 intraperitoneal injection in 50  $\mu$ L sterile PBS once weekly; combination treatments; or no  
385 treatment (Fig. S1). Ivermectin was solubilized in 45% (2-Hydroxypropyl)- $\beta$ -cyclodextrin (Sigma  
386 Aldrich, 332593-1KG), as previously described (34). Tumor growth was measured 2-3 times a  
387 week with a digital caliper for up to 56 days. Mice were euthanized when tumor growth reached  
388 1.5 cm in length or width. Tumor volume was calculated as  $(\text{length} \times \text{width}^2)/2$ . Metastasis  
389 experiments were performed by injecting  $0.5 \times 10^6$  luciferase expressing 4T1 tumor cells (4T1-  
390 Luc) subcutaneously in the mammary gland of female BALB/c mice, followed by surgically  
391 resection of the primary tumor on day 14 after inoculation. In vivo bioluminescence imaging was  
392 used to monitor metastatic outgrowth, which was carried out on a Lago X optical imaging system  
393 (Spectral Instruments Imaging, Tucson, AZ). Overall tumor burden per mouse was assessed  
394 weekly via bioluminescence imaging. Recurrence of primary tumor was recognized when the  
395 animal's luciferase value exceeded 600,000 photons/sec/cm<sup>2</sup>/steradian, a threshold chosen  
396 because it was well above the lower limit of reproducible detection (510,000) and because, in

397 optimization experiments, 600,000 was the lowest threshold consistently followed by ever-  
398 increasing values and eventually death. There was no significant toxicity following treatment with  
399 oral ivermectin combined with systemic anti-PD1 and IL-2 as measured by weight loss (Fig. S1).

#### 400 *Neoadjuvant Setting Mice and Treatment*

401 Female BALB/c mice were purchased from The Jackson Laboratories at 6-8 weeks of age  
402 and maintained in animal care facilities under pathogen-free conditions at the Massachusetts  
403 Institute of Technology. All procedures were performed under approval from MIT's Animal Care  
404 and Use Committee.

405 An inoculum of  $0.5 \times 10^6$  4T1-Luc tumor cells were injected subcutaneously (s.c.) in the  
406 mammary gland in 100  $\mu$ L sterile PBS. Tumor onset was monitored by palpation (usually 3-5  
407 days after inoculation). Six days following inoculation, mice were randomized into treatment  
408 groups and treatment was performed as indicated in Supp. Fig. 2. A dose of 5 mg/kg ivermectin  
409 was administered by oral gavage in 50  $\mu$ L sterile PBS. Anti-PD-1 (clone RMP1-14, BioXCell)  
410 was administered at 10 mg/kg by intraperitoneal injection in 50  $\mu$ L sterile PBS. MSA-IL2 was  
411 administered at 1.5 mg/kg by intraperitoneal injection in 50  $\mu$ L sterile PBS.

412 Surgical resection of primary tumor was performed on day 16 following tumor inoculation.  
413 Mice were injected with the analgesic sustained-release Buprenorphine (ZooPharm, 1 mg/kg  
414 body weight) and meloxicam (2 mg/kg body weight) by subcutaneous injection. Animals were  
415 anesthetized with isoflurane and complete anesthetization was confirmed by lack of a toe pinch  
416 reflex. The surgical area was shaved and sterilized by swabbing with alternating application of  
417 betadine surgical scrub and 70% ethanol. The tumor and surrounding mammary fat pad was  
418 removed by blunt dissection using autoclaved surgical instruments (Braintree Scientific).  
419 Wounds were closed using 4-0 nylon monofilament sutures with a 3/8 reverse cutting needle

420 (Ethilon). Mice were monitored for consciousness in a warm, dry area immediately post-  
421 operation. Thereafter, mice were dosed with meloxicam (2 mg/kg body weight) at 24 hour  
422 intervals for 3 days post-surgery. Sutures were removed at 7-10 days post-operation.

423 Mice were monitored for development of metastasis starting at day 10-14 following surgical  
424 resection of the primary tumor. Animals were injected i.p. with sterile-filtered D-luciferin  
425 (Xenogen) in PBS (150 mg/kg body weight in 200  $\mu$ L) and anesthetized with isoflurane.  
426 Bioluminescence images were collected at 10 minutes following injection with a IVIS Spectrum  
427 Imaging System (Xenogen). Acquisition times ranged 10-30 seconds. Images were analyzed  
428 using Living Image software (Xenogen). Animals were monitored daily for morbidity and  
429 euthanized if signs of distress were observed, including but not limited to difficulty in ambulating  
430 or breathing, significant weight loss (>20% starting body weight), poor body condition (score <2)  
431 or veterinary staff recommendation. Necropsy was performed to confirm presence of visible  
432 metastatic nodules.

433 To evaluate response to re-challenge, mice that survived metastasis development following  
434 surgical resection or naïve control mice were challenged with a subcutaneous injection of  
435  $0.1 \times 10^6$  4T1-Luc cells in 100  $\mu$ L sterile PBS in the flank opposite the site of the primary tumor.  
436 The mice were subsequently monitored every 2-3 days for tumor growth at the inoculation site.

#### 437 *ELISPOT assay*

438 Target 4T1-Luc cells were treated with mouse IFN-gamma (Peprotech) for 18 hours, washed,  
439 and irradiated (120 Gy). Splenocytes were isolated from untreated or treated mice on day 16  
440 following to tumor re-challenge. Quantification of IFN-g response was determined using a BD  
441 mouse IFN-g ELISPOT kit. Target cells were seeded at  $0.025 \times 10^6$  cells per well. Effector cells  
442 were seeded  $1.0 \times 10^6$  cells per well. Plates were wrapped in foil and incubated at 37°C for 24

443 hours and developed following the manufacture's protocol. Plates were scanned using a CTL-  
444 ImmunoSpot plate reader and spots were enumerated using CTL ImmunoSpot software.

445

#### 446 *Tissue staining and quantification*

447 Tumors were isolated from mice and sectioned into 5 micrometer sections for staining  
448 with the desired markers (below) using Tyramide Signal Amplification (PerkinElmer, Waltham  
449 MA) per manufacturer's protocol. Whole tumor images were scanned using the Vectra 3  
450 Automated imaging system (PerkinElmer) and quantified using the ImagePro analysis software.

451

#### 452 *Flow cytometry*

453 Cell surface markers were stained for 30 minutes in the dark at 4°C. Intracellular cytokine  
454 staining was performed using the ebioscience Foxp3 staining kit (Thermo Fisher Scientific,  
455 Waltham MA) per manufacturer's protocol. The following mouse antibodies from BioLegend  
456 (San Diego CA) were used: CD4 (GK1.5); CD8 (53-6.7); Tbet (4B10); Gata3 (16E10A23); Foxp3  
457 (MF-14); IFN $\gamma$  (XMG1.2); IL-10 (JES5-16E3); IL17 (TC11-18H10.1); and TGF $\beta$  (TW7-16B4).  
458 ROR $\gamma$ t (AFKJS-9) was ordered from eBioscience (ThermoFisher Scientific). To show T cell  
459 reactivity, splenocytes were isolated from tumor bearing mice and cultured with 4T1 cells at a  
460 ratio of 5:1 (splenocytes to tumor cells) in the presence anti-CD107A/CD107B (ThermoFisher  
461 Scientific) and Monensin for 4 hours. After 4 hours, cells were stained for surface and  
462 intracellular markers described above. Flow cytometry analysis of T cell markers on human  
463 PBMCs was performed using the following clones: CD8 (RPA-T8); CD4 (SK3); Tbet (4B10); Ki67  
464 (Ki67) from BioLegend; ROR $\gamma$ t and granzyme B (GB11) from ThermoFisher Scientific.

465

466 *Statistical analysis*

467 Mean values were compared using t tests. Data on tumor volume over time were log-  
468 transformed prior to statistical modeling; prior to transformation, values of zero were replaced  
469 with 0.1. complete response (CR) to treatment was defined as permanent shrinkage of tumor  
470 volume to zero at any time during follow-up; no tumor that shrank to zero resumed growth. The  
471 competing survival outcome was progression, defined as tumor growth beyond 150 mm<sup>3</sup>, after  
472 which tumors never underwent CR but instead became necrotic or large, necessitating  
473 euthanasia. The follow-up of subjects that experienced neither CR nor progression was  
474 censored at last observation, except when the last available tumor measurement fell just short  
475 of the 150 mm<sup>3</sup> threshold for progression; in such cases (n=2, volume 139 and 141 mm<sup>3</sup>,  
476 respectively, at final measurement on Day 25), progression was assumed to occur by what would  
477 have been the next scheduled measurement.

478 Cumulative incidence of competing outcomes was calculated and plotted according to  
479 Gray(35). The related outcomes of tumor volume, CR, and progression were modeled jointly(36).  
480 The submodel of longitudinal tumor volume used linear mixed regression, while the survival  
481 submodels of CR and progression used parametric hazard regression with Weibull function.  
482 Statistical significance was defined as p<0.05. A greater-than-additive (synergy) effect of  
483 combination therapy was demonstrated when the sum of effects of each drug alone fell outside  
484 the 95% confidence interval around the effect of combination therapy. To maximize statistical  
485 power and obtain unbiased results despite the non-random missingness of longitudinal data due  
486 to death, each pair of outcome measures per trial was modeled jointly (36). Each joint model  
487 included a linear mixed effects submodel of the longitudinal outcome and a survival submodel.



488 To keep the trials' overall risk of error below 5%, p values for the primary hypothesis for synergy  
489 from combination treatment were subjected to the step-up Bonferroni adjustment of Hochberg  
490 (37). Separately, p values for the secondary hypotheses underwent the same adjustment.

491 **References**

- 492 1. Pardoll DM. The blockade of immune checkpoints in cancer immunotherapy. *Nature reviews*  
493 *Cancer*. 2012;12(4):252-64.
- 494 2. Sharma P, and Allison JP. The future of immune checkpoint therapy. *Science*.  
495 2015;348(6230):56-61.
- 496 3. Disis ML, and Stanton SE. Triple-negative breast cancer: immune modulation as the new  
497 treatment paradigm. *American Society of Clinical Oncology educational book American Society*  
498 *of Clinical Oncology Meeting*. 2015:e25-30.
- 499 4. Nanda R, Chow LQ, Dees EC, Berger R, Gupta S, Geva R, et al. Pembrolizumab in Patients  
500 With Advanced Triple-Negative Breast Cancer: Phase Ib KEYNOTE-012 Study. *Journal of*  
501 *clinical oncology : official journal of the American Society of Clinical Oncology*.  
502 2016;34(21):2460-7.
- 503 5. Galluzzi L, Buque A, Kepp O, Zitvogel L, and Kroemer G. Immunogenic cell death in cancer  
504 and infectious disease. *Nature reviews Immunology*. 2017;17(2):97-111.
- 505 6. Kroemer G, Galluzzi L, Kepp O, and Zitvogel L. Immunogenic cell death in cancer therapy.  
506 *Annual review of immunology*. 2013;31:51-72.
- 507 7. Galluzzi L, Vitale I, Warren S, Adjemian S, Agostinis P, Martinez AB, et al. Consensus  
508 guidelines for the definition, detection and interpretation of immunogenic cell death. *Journal for*  
509 *ImmunoTherapy of Cancer*. 2020;8(1):e000337.
- 510 8. Apetoh L, Ghiringhelli F, Tesniere A, Obeid M, Ortiz C, Criollo A, et al. Toll-like receptor 4-  
511 dependent contribution of the immune system to anticancer chemotherapy and radiotherapy.  
512 *Nature medicine*. 2007;13(9):1050-9.
- 513 9. Michaud M, Martins I, Sukkurwala AQ, Adjemian S, Ma Y, Pellegatti P, et al. Autophagy-  
514 dependent anticancer immune responses induced by chemotherapeutic agents in mice. *Science*.  
515 2011;334(6062):1573-7.
- 516 10. Casares N, Pequignot MO, Tesniere A, Ghiringhelli F, Roux S, Chaput N, et al. Caspase-  
517 dependent immunogenicity of doxorubicin-induced tumor cell death. *The Journal of*  
518 *experimental medicine*. 2005;202(12):1691-701.
- 519 11. Mattarollo SR, Loi S, Duret H, Ma Y, Zitvogel L, and Smyth MJ. Pivotal role of innate and  
520 adaptive immunity in anthracycline chemotherapy of established tumors. *Cancer research*.  
521 2011;71(14):4809-20.
- 522 12. DeNardo DG, Brennan DJ, Rexhepaj E, Ruffell B, Shiao SL, Madden SF, et al. Leukocyte  
523 complexity predicts breast cancer survival and functionally regulates response to chemotherapy.  
524 *Cancer discovery*. 2011;1(1):54-67.
- 525 13. Denkert C, Loibl S, Noske A, Roller M, Muller BM, Komor M, et al. Tumor-associated  
526 lymphocytes as an independent predictor of response to neoadjuvant chemotherapy in breast  
527 cancer. *Journal of clinical oncology : official journal of the American Society of Clinical*  
528 *Oncology*. 2010;28(1):105-13.
- 529 14. Ladoire S, Mignot G, Dabakuyo S, Arnould L, Apetoh L, Rebe C, et al. In situ immune response  
530 after neoadjuvant chemotherapy for breast cancer predicts survival. *The Journal of pathology*.  
531 2011;224(3):389-400.
- 532 15. Halama N, Michel S, Kloor M, Zoernig I, Benner A, Spille A, et al. Localization and density of  
533 immune cells in the invasive margin of human colorectal cancer liver metastases are prognostic  
534 for response to chemotherapy. *Cancer research*. 2011;71(17):5670-7.
- 535 16. Ray-Coquard I, Cropet C, Van Glabbeke M, Sebban C, Le Cesne A, Judson I, et al.

- 536 Lymphopenia as a prognostic factor for overall survival in advanced carcinomas, sarcomas, and  
537 lymphomas. *Cancer research*. 2009;69(13):5383-91.
- 538 17. Draganov D, Gopalakrishna-Pillai S, Chen YR, Zuckerman N, Moeller S, Wang C, et al.  
539 Modulation of P2X4/P2X7/Pannexin-1 sensitivity to extracellular ATP via Ivermectin induces a  
540 non-apoptotic and inflammatory form of cancer cell death. *Scientific reports*. 2015;5:16222.
- 541 18. Kepp O, Senovilla L, Vitale I, Vacchelli E, Adjemian S, Agostinis P, et al. Consensus guidelines  
542 for the detection of immunogenic cell death. *Oncoimmunology*. 2014;3(9):e955691.
- 543 19. Rubio V, Stuge TB, Singh N, Betts MR, Weber JS, Roederer M, et al. Ex vivo identification,  
544 isolation and analysis of tumor-cytolytic T cells. *Nature medicine*. 2003;9(11):1377-82.
- 545 20. Boyman O, Krieg C, Letourneau S, Webster K, Surh CD, and Sprent J. Selectively expanding  
546 subsets of T cells in mice by injection of interleukin-2/antibody complexes: implications for  
547 transplantation tolerance. *Transplantation proceedings*. 2012;44(4):1032-4.
- 548 21. Moynihan KD, Opel CF, Szeto GL, Tzeng A, Zhu EF, Engreitz JM, et al. Eradication of large  
549 established tumors in mice by combination immunotherapy that engages innate and adaptive  
550 immune responses. *Nature medicine*. 2016;22(12):1402-10.
- 551 22. Zhu EF, Gai SA, Opel CF, Kwan BH, Surana R, Mihm MC, et al. Synergistic innate and  
552 adaptive immune response to combination immunotherapy with anti-tumor antigen antibodies  
553 and extended serum half-life IL-2. *Cancer cell*. 2015;27(4):489-501.
- 554 23. Crump A, and Omura S. Ivermectin, 'wonder drug' from Japan: the human use perspective.  
555 *Proceedings of the Japan Academy Series B, Physical and biological sciences*. 2011;87(2):13-  
556 28.
- 557 24. Burnstock G, and Di Virgilio F. Purinergic signalling and cancer. *Purinergic signalling*.  
558 2013;9(4):491-540.
- 559 25. Junger WG. Immune cell regulation by autocrine purinergic signalling. *Nature reviews*  
560 *Immunology*. 2011;11(3):201-12.
- 561 26. Aswad F, and Dennert G. P2X7 receptor expression levels determine lethal effects of a purine  
562 based danger signal in T lymphocytes. *Cellular immunology*. 2006;243(1):58-65.
- 563 27. Bianchi G, Vuerich M, Pellegatti P, Marimpietri D, Emionite L, Marigo I, et al. ATP/P2X7 axis  
564 modulates myeloid-derived suppressor cell functions in neuroblastoma microenvironment. *Cell*  
565 *Death Dis*. 2014;5:e1135.
- 566 28. Principi E, and Raffaghello L. The role of the P2X7 receptor in myeloid-derived suppressor cells  
567 and immunosuppression. *Curr Opin Pharmacol*. 2019;47:82-9.
- 568 29. Ledderose C, Liu K, Kondo Y, Slubowski CJ, Dertnig T, Denicolo S, et al. Purinergic P2X4  
569 receptors and mitochondrial ATP production regulate T cell migration. *The Journal of clinical*  
570 *investigation*. 2018;128(8):3583-94.
- 571 30. Palmer AC, Izar B, and Sorger PK. Combinatorial benefit without synergy in recent clinical  
572 trials of immune checkpoint inhibitors. *medRxiv*. 2020:2020.01.31.20019604.
- 573 31. Boutros C, Tarhini A, Routier E, Lambotte O, Ladurie FL, Carbonnel F, et al. Safety profiles of  
574 anti-CTLA-4 and anti-PD-1 antibodies alone and in combination. *Nat Rev Clin Oncol*.  
575 2016;13(8):473-86.
- 576 32. Gao L, Yang X, Yi C, and Zhu H. Adverse Events of Concurrent Immune Checkpoint Inhibitors  
577 and Antiangiogenic Agents: A Systematic Review. *Front Pharmacol*. 2019;10:1173.
- 578 33. Duan Q, Zhang H, Zheng J, and Zhang L. Turning Cold into Hot: Firing up the Tumor  
579 Microenvironment. *Trends Cancer*. 2020;6(7):605-18.
- 580 34. Melotti A, Mas C, Kuciak M, Lorente-Trigos A, Borges I, and Ruiz i Altaba A. The river  
581 blindness drug Ivermectin and related macrocyclic lactones inhibit WNT-TCF pathway

- 582 responses in human cancer. *EMBO molecular medicine*. 2014;6(10):1263-78.
- 583 35. Gray R. cmprsk: Subdistribution Analysis of Competing Risks. R package version 2.2-7.
- 584 <https://CRAN.R-project.org/package=cmprsk>
- 585 36. Wang W, Wang W, Mosley TH, and Griswold ME. A SAS macro for the joint modeling of
- 586 longitudinal outcomes and multiple competing risk dropouts. *Computer methods and programs*
- 587 *in biomedicine*. 2017;138:23-30.
- 588 37. Hochberg Y. A Sharper Bonferroni Procedure for Multiple Tests of Significance. *Biometrika*.
- 589 1988;75(4):800-2.

590

591

592 **Table 1**

593

594 1A. Tumor Growth in Primary Treatment

| Tumor Growth per (log)Day | Estimate (SE) | Effect of Treatment (SE) | Submodel p value | False Discovery Rate |
|---------------------------|---------------|--------------------------|------------------|----------------------|
| No Treatment              | 3.47 (0.18)   |                          |                  |                      |
| A – Ivermectin only       |               | -0.84 (0.26)             |                  |                      |
| B – anti-PD1 only         |               | -1.46 (0.30)             |                  |                      |
| Beyond Product of A + B   |               | -1.05 (0.38)             | 0.008            | 3%                   |

595

596

597 1B. Relapse-Free Survival in Adjuvant Setting

| Parameter               | Hazards Ratio (95% CI) | Submodel p value | False Discovery Rate |
|-------------------------|------------------------|------------------|----------------------|
| No Treatment            | 1.00                   |                  |                      |
| A – Ivermectin only     | 0.91 (0.36-2.26)       |                  |                      |
| B – anti-PD1 only       | 0.84 (0.33-2.10)       |                  |                      |
| Beyond Product of A + B | 0.12 (0.03-0.54)       | 0.007            | 2%                   |
| Adding IL-2 to A + B    | 0.68 (0.22-2.13)       | 0.51             | (67%)                |

598

599

600 1C. Relapse-Free Survival in Metastatic Setting

| Parameter               | Hazards Ratio (95% CI) | Submodel p value | False Discovery Rate |
|-------------------------|------------------------|------------------|----------------------|
| No Treatment            | 1.00                   |                  |                      |
| A – Ivermectin only     | 1.48 (0.41-5.39)       |                  |                      |
| B – anti-PD1 only       | 0.75 (0.21-2.72)       |                  |                      |
| Beyond Product of A + B | 0.02 (0-0.16)          | <0.001           | <1%                  |
| Adding IL-2 to A + B    | 0.58 (0.05-6.18)       | 0.64             | (73%)                |

601

Untreated Tumor

Tumor on IVM

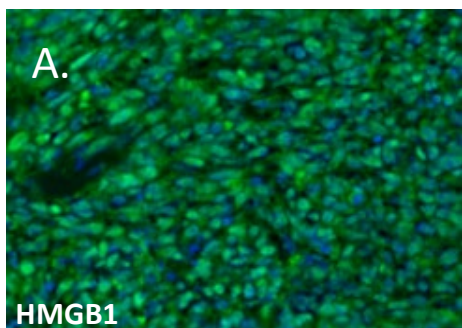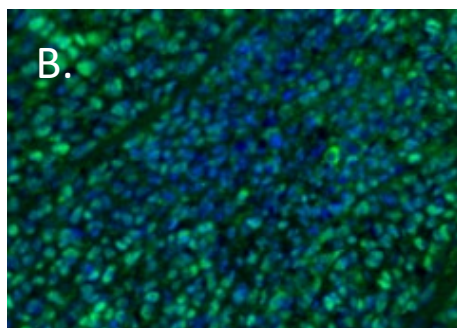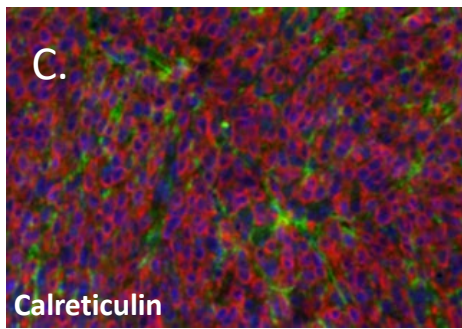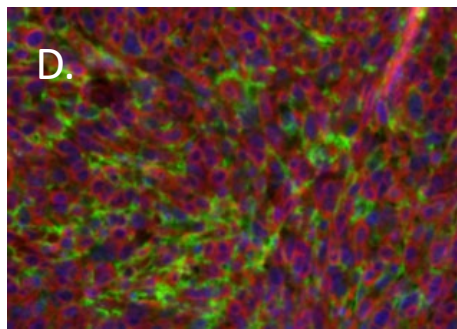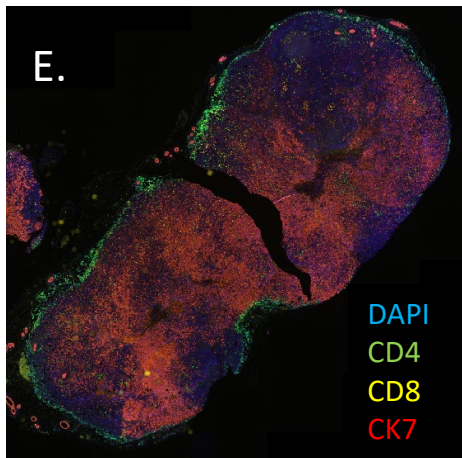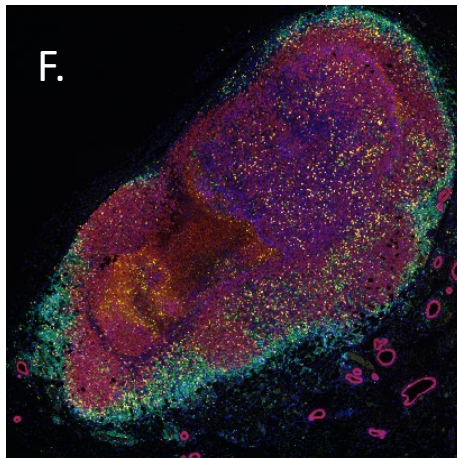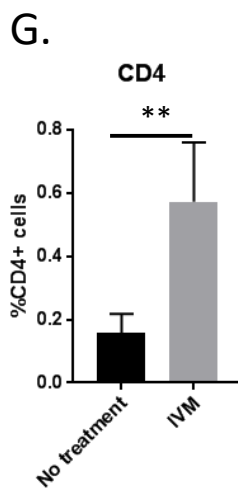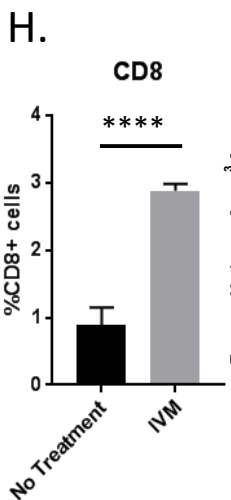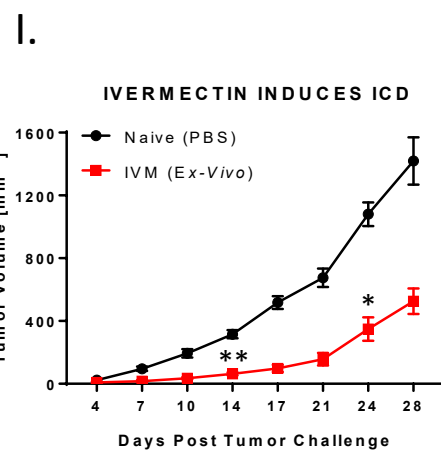

Fig. 1



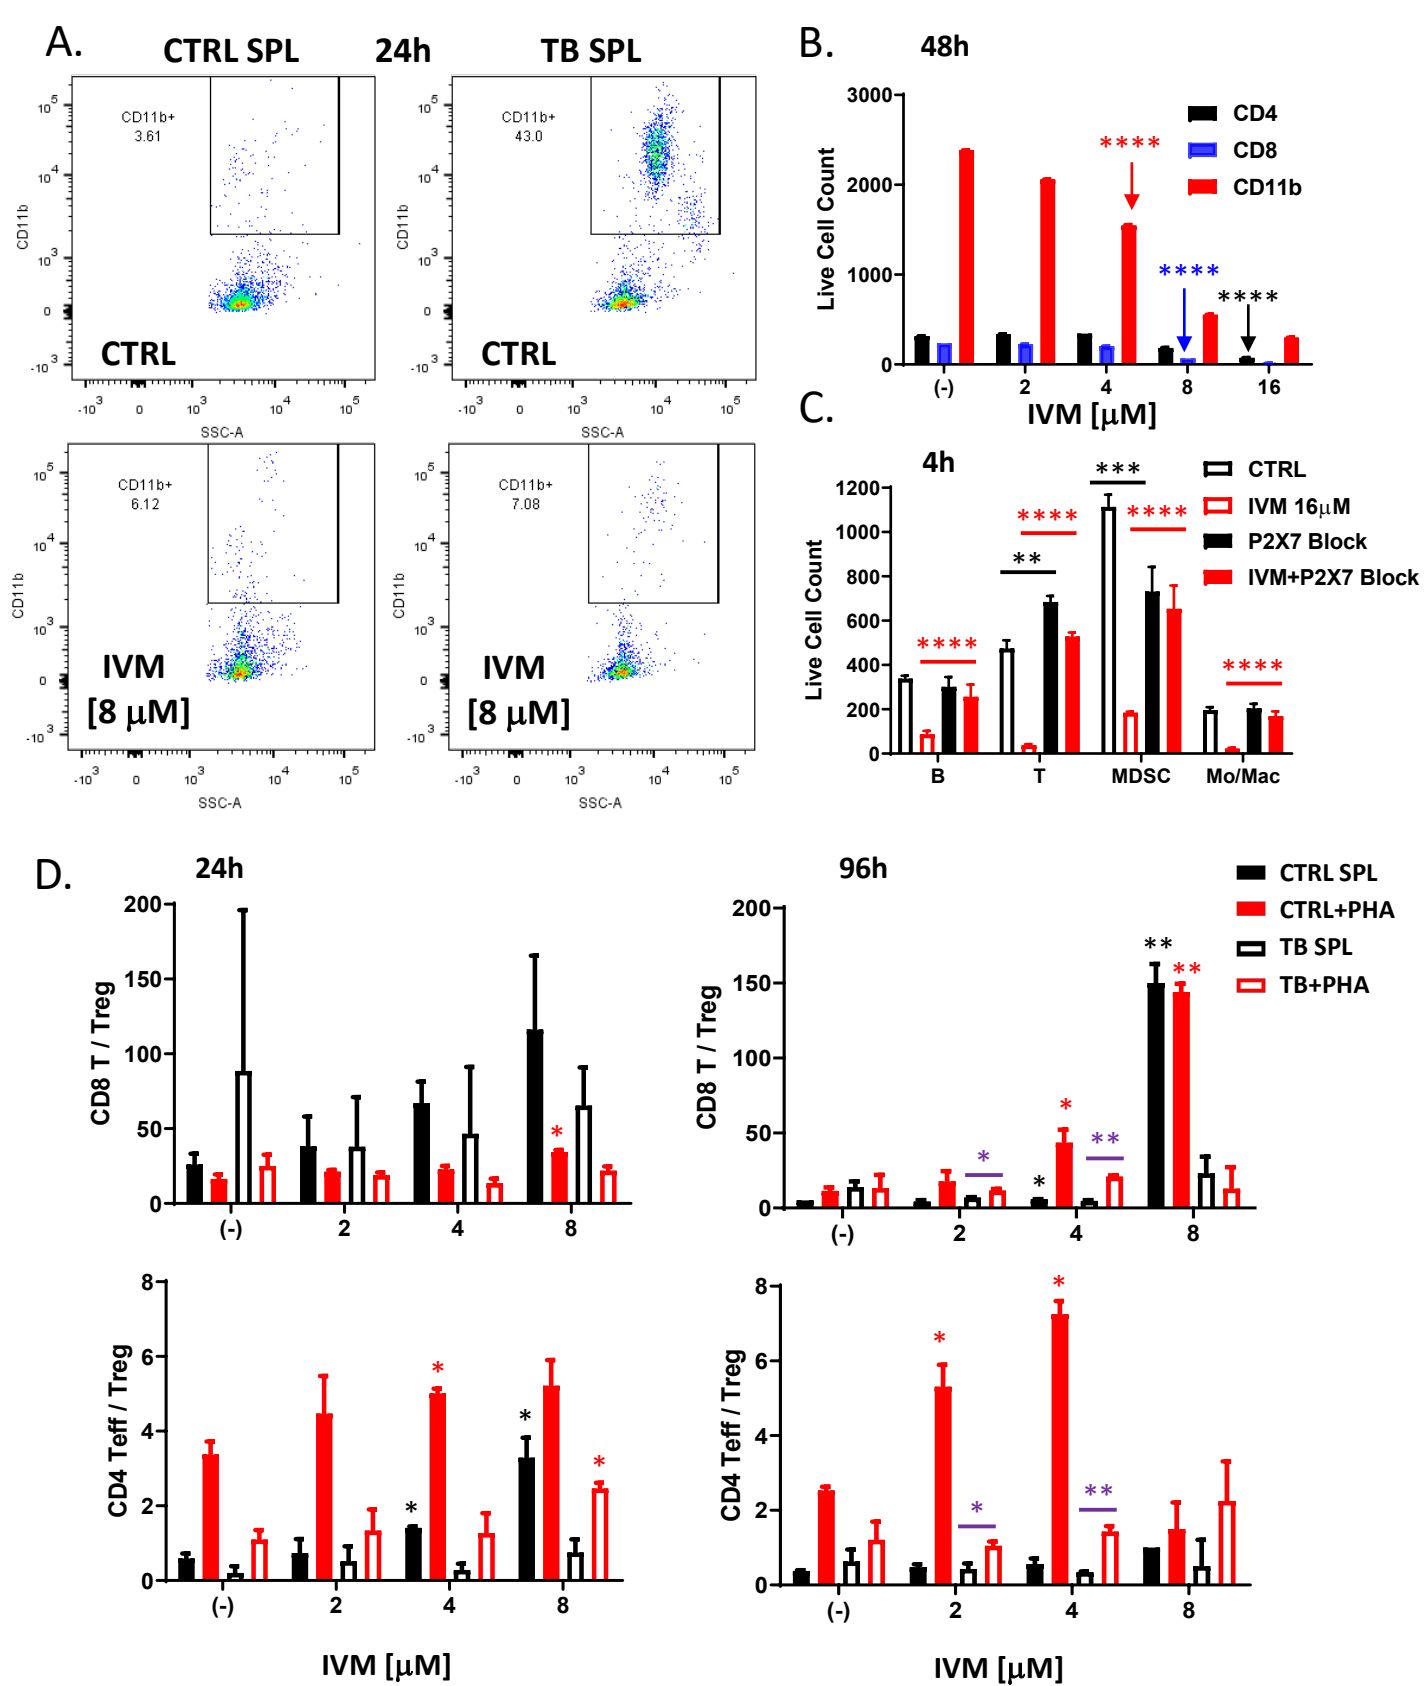

Fig. 2

A.

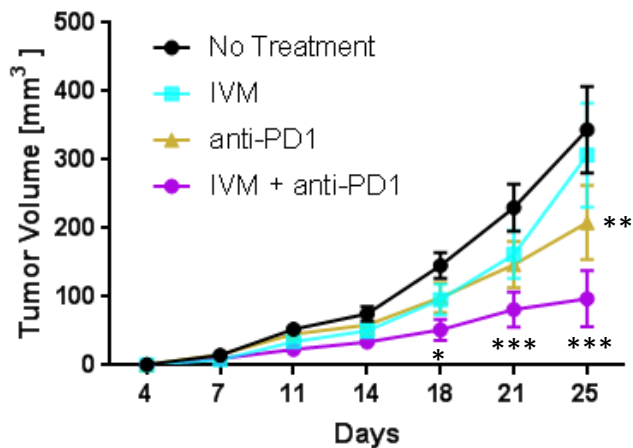

B.

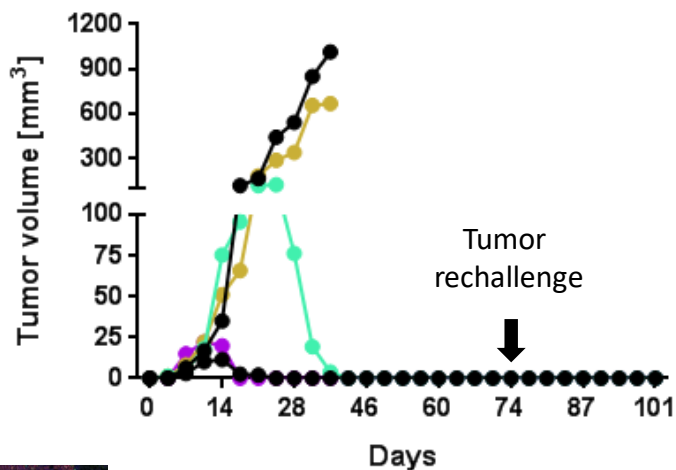

C.

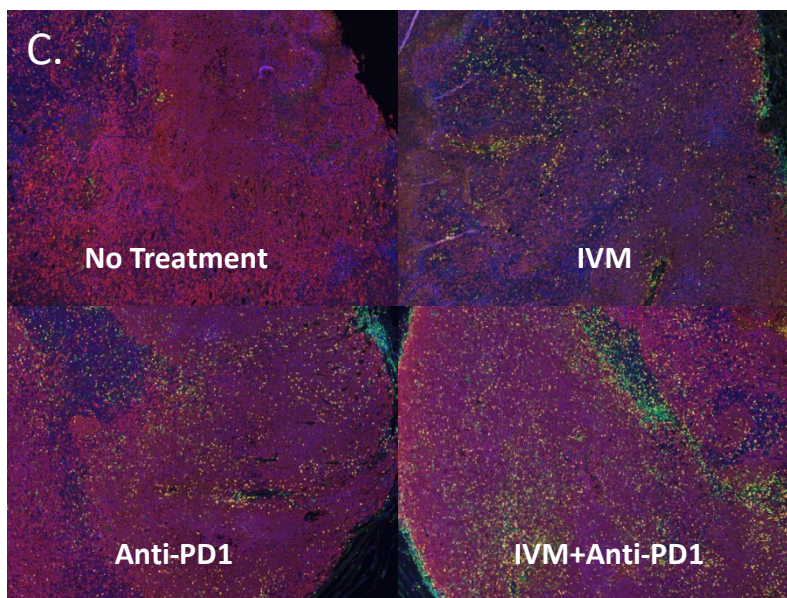

D.

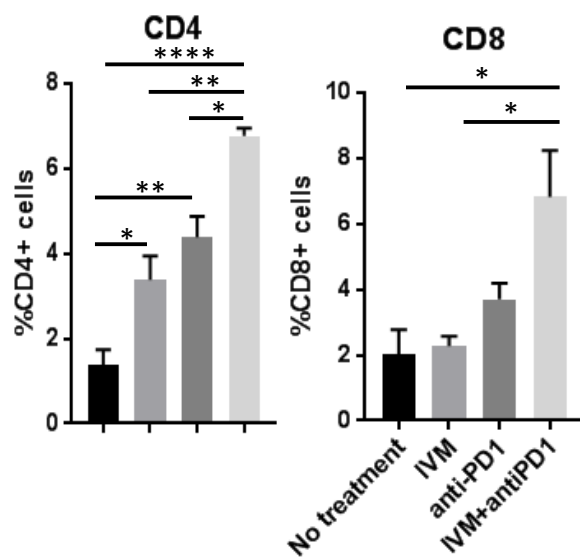

E.

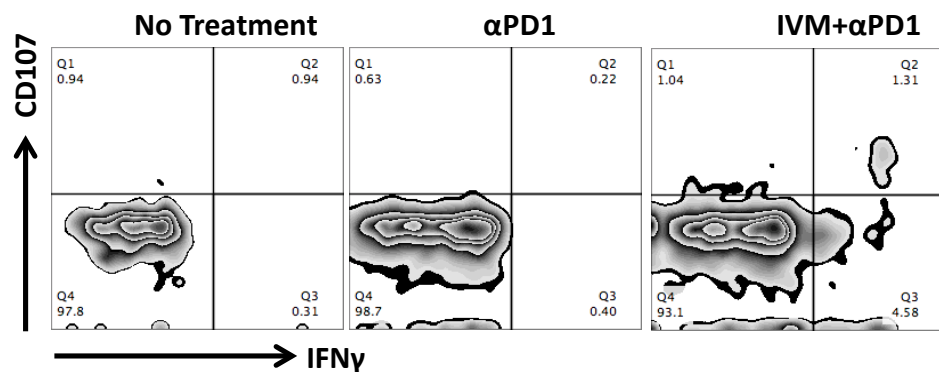

F.

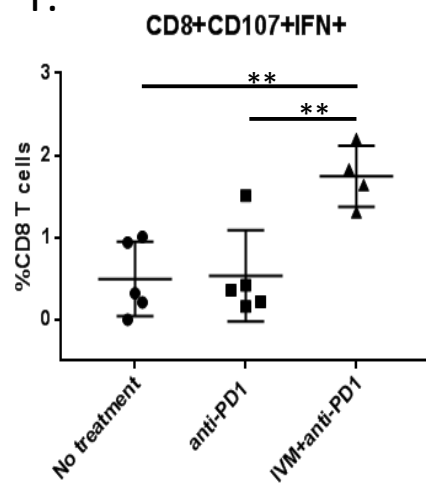

Fig. 3



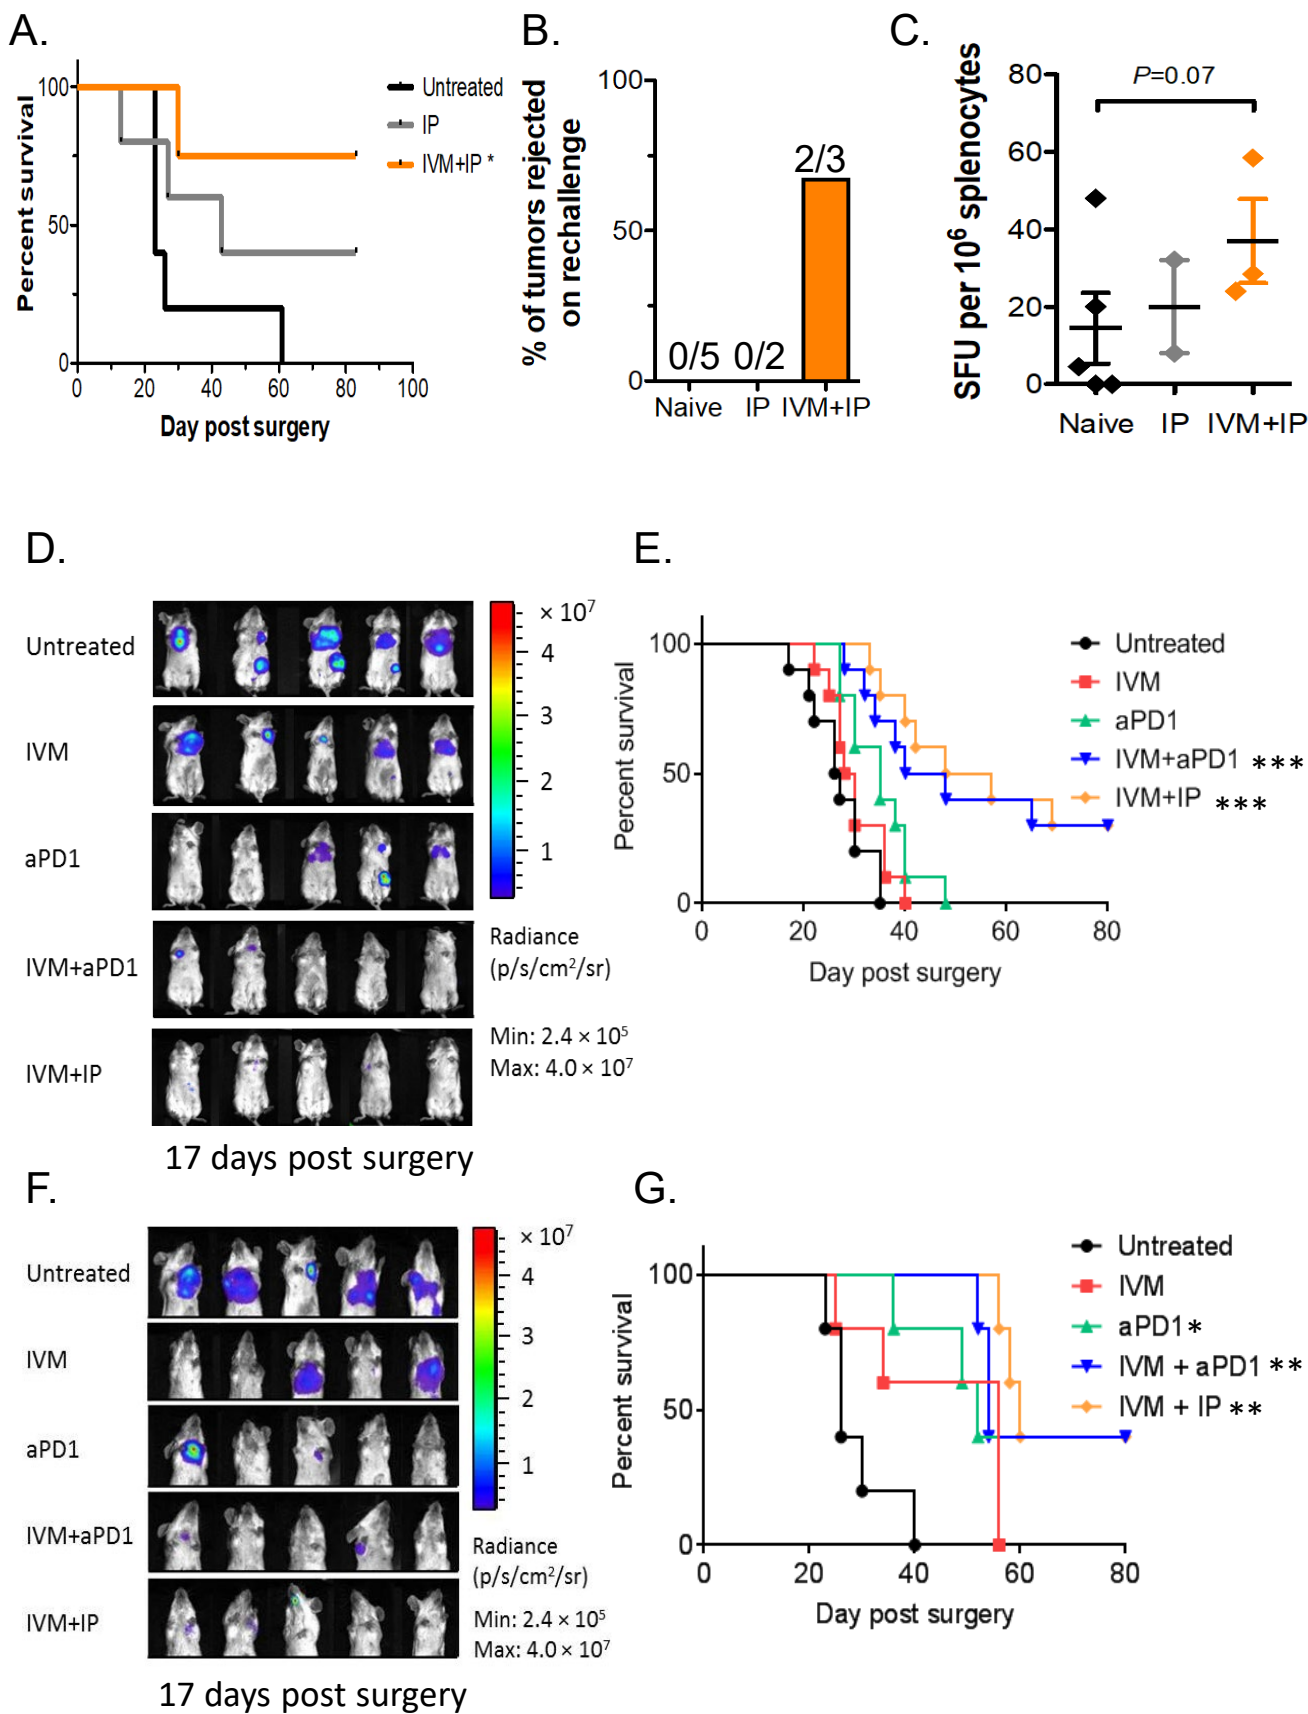

Fig. 4

## Supplementary Materials

**Supplementary Table 1.** Experimental Design, Treatment Settings

|                       | Surgical Resection of Tumor | Ivermectin Alone | Anti-PD1 Antibody Alone | Combined Treatment | No Treatment | Days of Observation |
|-----------------------|-----------------------------|------------------|-------------------------|--------------------|--------------|---------------------|
| Primary               | No                          |                  |                         |                    |              |                     |
| Experiment A          |                             | 5                | 0                       | 0                  | 5            | 25                  |
| Experiment B          |                             | 5                | 0                       | 0                  | 5            | 21                  |
| Experiment C          |                             | 5                | 5                       | 5                  | 5            | 21                  |
| Experiment D          |                             | 0                | 5                       | 5                  | 5            | 49                  |
| Experiment E          |                             | 5                | 0                       | 5                  | 5            | 56                  |
| Total (N=70)          |                             | 20               | 10                      | 15                 | 25           |                     |
| Neoadjuvant With IL-2 | Yes                         |                  | 5 (Anti-PD1 + MSA-IL-2) | 5 <sup>#</sup>     | 5            | 84                  |
| Adjuvant With IL-2    | Yes                         | 0                | 0                       | 10                 | 0            | 84                  |
| Without IL-2          |                             | 10               | 10                      | 10                 | 10           |                     |
| Total (N=50)          |                             | 10               | 10                      | 20                 | 10           |                     |
| Metastatic With IL-2  | Yes                         | 5                | 5                       | 10                 | 0            | 82                  |
| Without IL-2          |                             | 5                | 5                       | 5                  | 5            |                     |
| Total (N=40)          |                             | 10               | 10                      | 15                 | 5            |                     |

# The IP+IVM treatment group shown in Fig. 3A had n=5 with 1 death from surgery complication — thus survival was shown for n=4.

A.

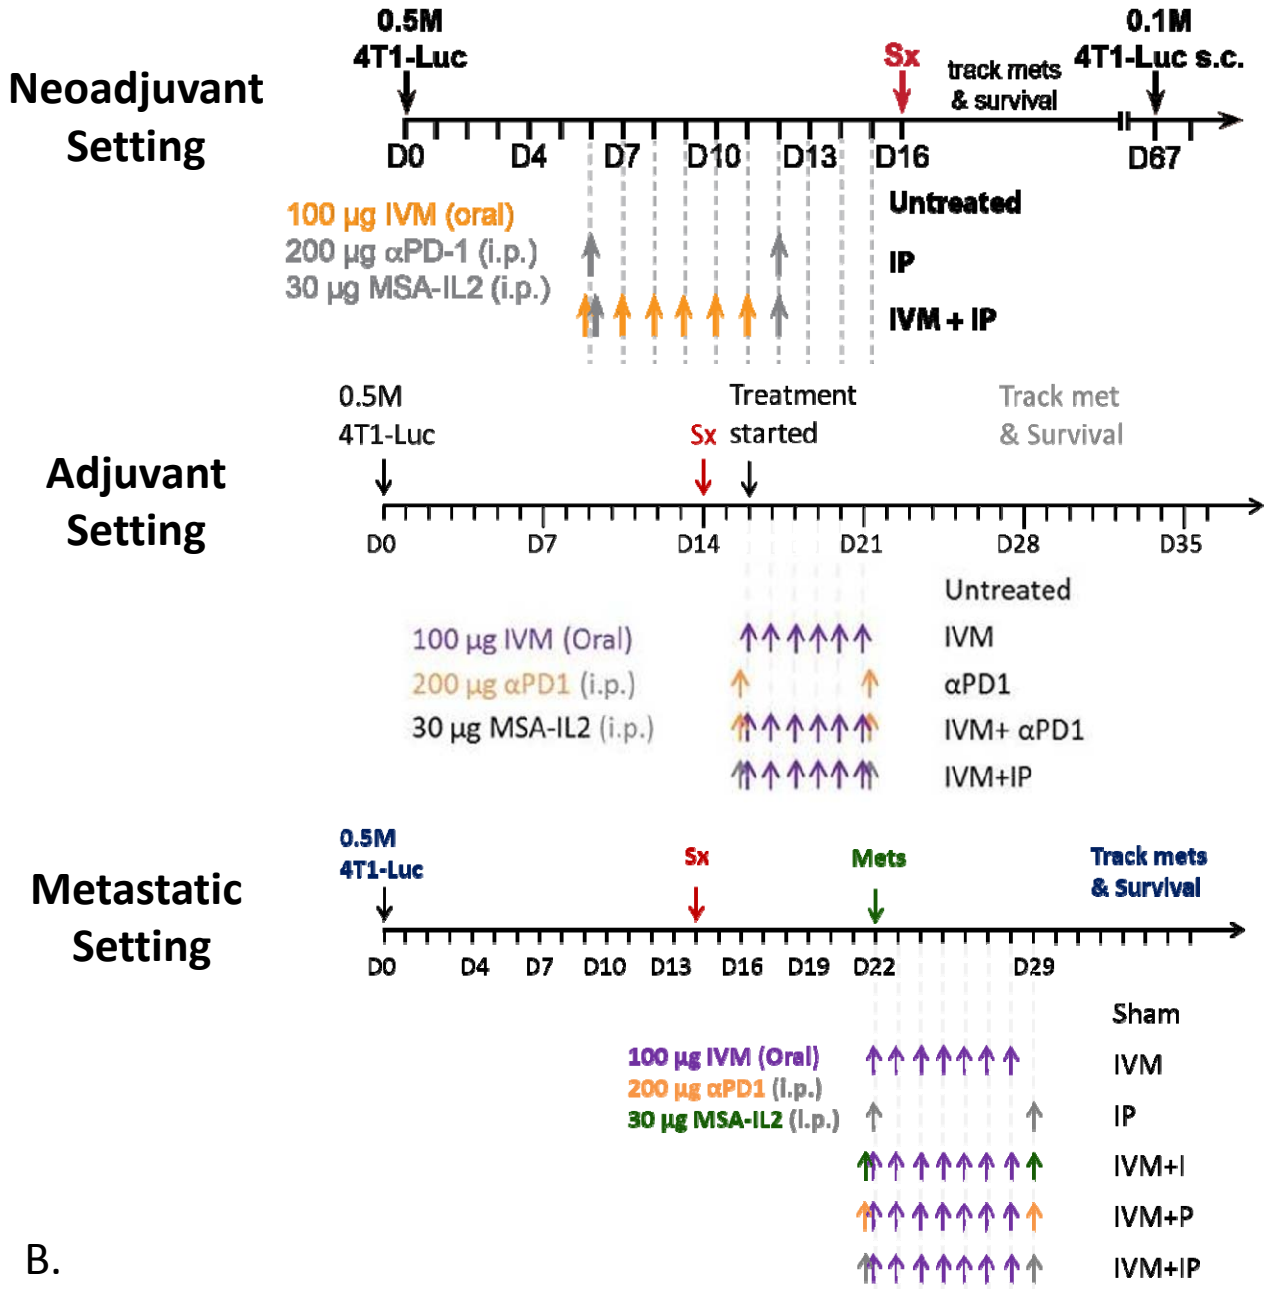

B.

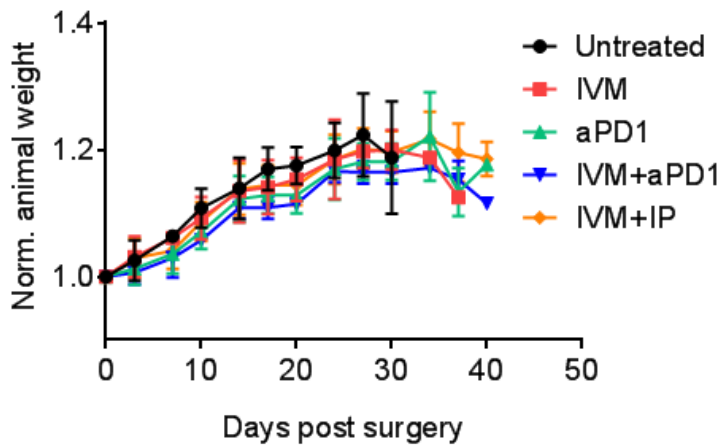

**Fig S1.** (A) Treatment schedules in the neoadjuvant, adjuvant, and metastatic settings (surgical resection = **Sx**). (B) Body weight measurements of treated animals demonstrating the absence of significant synergistic toxicity associated with the combination of anti-PD-1 and Ivermectin in the adjuvant settings. Similar observations were seen in the metastatic treatment settings.

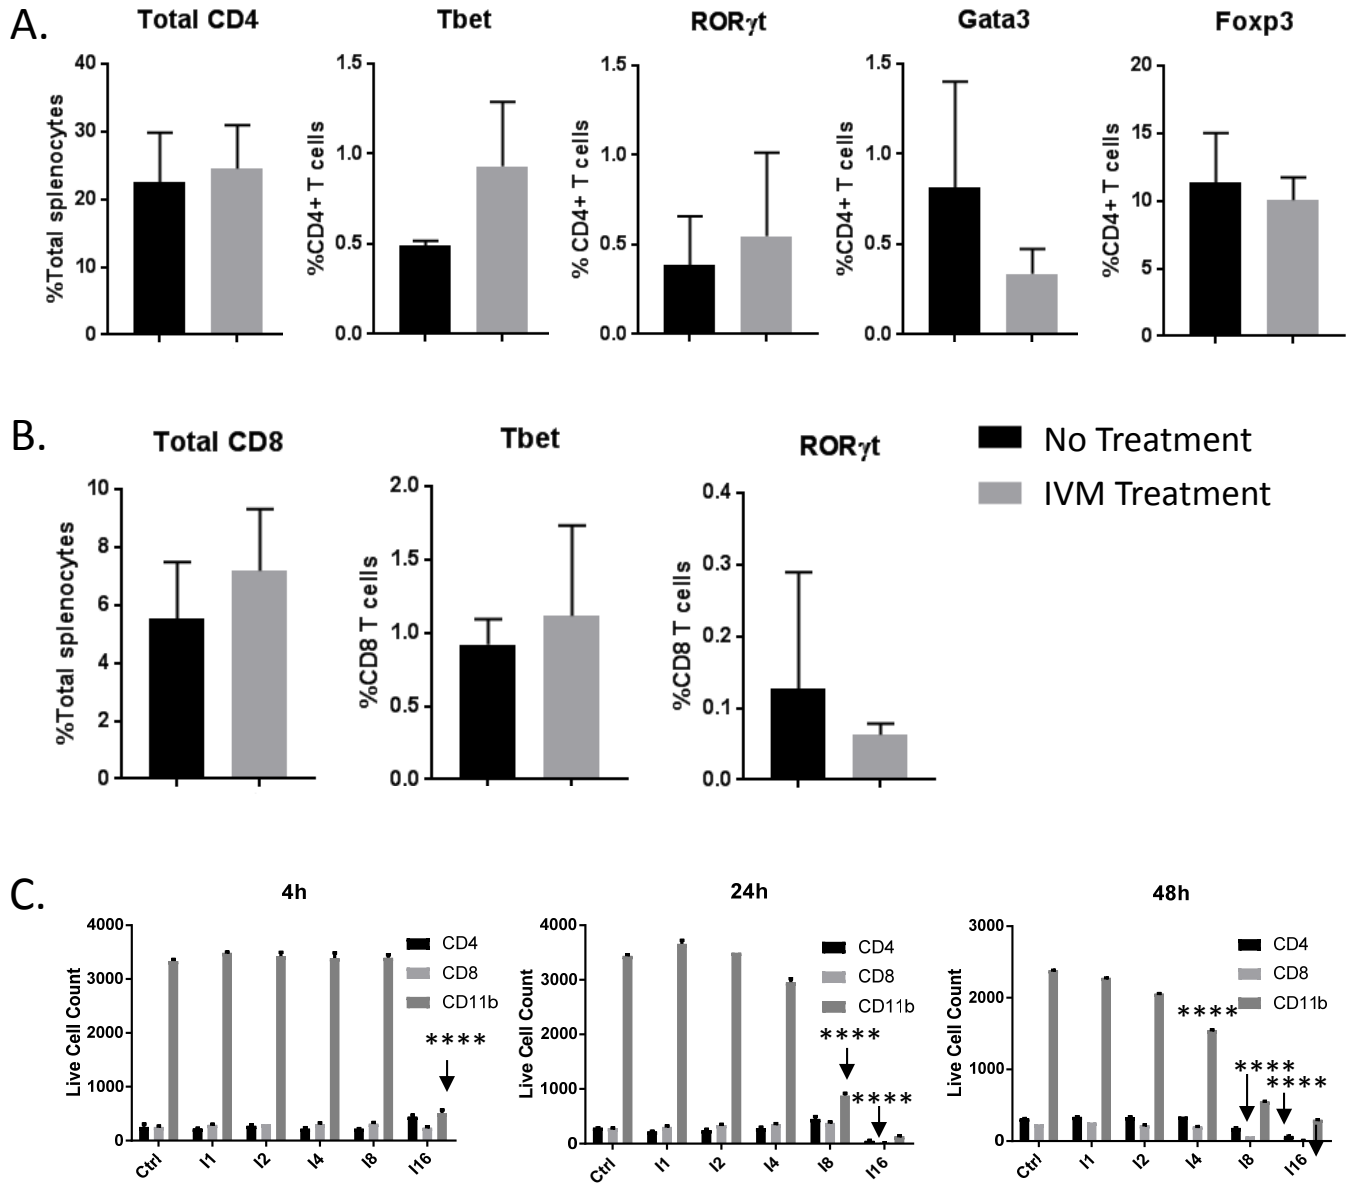

**Fig S2. Immunomodulatory effects of Ivermectin on immune cells *in vivo* and *ex vivo*.** (A)

Flow cytometry analysis of splenocytes from 4T1 tumor-bearing animals treated with ivermectin, demonstrating the absence of significant changes *in vivo* of various CD4 (A) and CD8 (B) effector and regulatory T cell subpopulations, which were identified based on the expression of key transcriptional factors as indicated. All comparisons were non-significant, NS. (C)

Differential sensitivity of immune subpopulations in splenocytes isolated from 4T1 tumor-bearing mice exposed *ex vivo* to increasing (1-16  $\mu\text{M}$ ) doses of ivermectin for 4h to 48h showing dose and time-dependent sensitivity. A linear mixed effects model of log cell count adjusted for cell type revealed that the CD11b<sup>+</sup> myeloid cells were the most sensitive to ivermectin, showing significant reductions with as little as 4  $\mu\text{M}$  after 48 hours, or 8  $\mu\text{M}$  after 24 hours, or 16  $\mu\text{M}$  after 4 hours (each result,  $p < 0.0001$ ). In contrast, achieving similar reductions in lymphocytes required higher doses and/or longer exposure to ivermectin, being observed in CD8<sup>+</sup> cells only after 48 hours of 8  $\mu\text{M}$  or 24 hours of 16  $\mu\text{M}$  and in CD4<sup>+</sup> cells only after the maximum exposure (48 hours of 16  $\mu\text{M}$ ). Statistical significance versus (-) CTRL or as indicated was evaluated using the linear mixed effects model of log cell count adjusted for cell type, \*\*\*\*  $p \leq 0.0001$ .
